# Supplementary material for: Computational design of boron-free triangular molecules with inverted singlet–triplet energy gap
Source: Royal Society of Chemistry journal article supplement (doi:10.1039/d4cp01658k), 2024-01-01
Supplement: d4cp01658k1.pdf [file d4cp01658k1.pdf]

Electronic Supplementary Information (ESI)

**Computational Design of Boron-Free Triangular Molecules  
with Inverted Singlet-Triplet Energy Gap**

Magdalena W. Duszka, Michał F. Rode, and Andrzej L. Sobolewski

Institute of Physics, Polish Academy of Sciences, Warsaw, Poland

**Table S1.** Vertical absorption energy of the lowest singlet ( $E(S_1)$ ), and lowest triplet ( $E(T_1)$ ) states (spatial symmetry labels in parenthesis), energy gap between the lowest singlet and lowest triplet states ( $\Delta_{ST} = E(S_1) - E(T_1)$ , in eV), and oscillator strength ( $f$ ), determined with the ADC(2)/cc-pVDZ method at the ground-state equilibrium geometry optimized at the MP2/cc-pVDZ level of theory for **PO** and its derivatives with nitrogen substitutions within the external rim.

| abbreviation  | molecule                                                                            | $E(S_1)$<br>$E(T_1)$<br>$\Delta_{ST}$<br>$f$               | abbreviation  | molecule                                                                             | $E(S_1)$<br>$E(T_1)$<br>$\Delta_{ST}$<br>$f$              |
|---------------|-------------------------------------------------------------------------------------|------------------------------------------------------------|---------------|--------------------------------------------------------------------------------------|-----------------------------------------------------------|
| <b>PO</b>     | 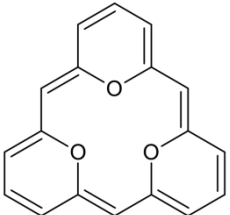 | 1.597 ( $^1B_1$ )<br>1.911 ( $^3A_1$ )<br>- 0.314<br>0.000 | <b>PO-3N</b>  |  | 2.049 ( $^1B_1$ )<br>2.398 ( $^3B_1$ )<br>-0.349<br>0.000 |
| <b>PO-2Na</b> |  | 1.689 ( $^1B_1$ )<br>1.862 ( $^3B_1$ )<br>-0.173<br>0.025  | <b>PO-4Na</b> |  | 1.953 ( $^1B_1$ )<br>1.981 ( $^3B_1$ )<br>-0.028<br>0.072 |
| <b>PO-2Nb</b> |  | 1.873 ( $^1B_1$ )<br>2.051 ( $^3B_1$ )<br>-0.178<br>0.014  | <b>PO-4Nb</b> |  | 1.888 ( $^1B_1$ )<br>2.043 ( $^3B_1$ )<br>-0.155<br>0.021 |
| <b>PO-2Nc</b> |  | 1.720 ( $^1B_1$ )<br>1.989 ( $^3B_1$ )<br>-0.269<br>0.002  | <b>PO-6N</b>  |  | 2.124 ( $^1B_1$ )<br>2.518 ( $^3B_1$ )<br>-0.394<br>0.000 |

|               |                                                                                   |                                                                                                   |              |                                                                                    |                                                                                                   |
|---------------|-----------------------------------------------------------------------------------|---------------------------------------------------------------------------------------------------|--------------|------------------------------------------------------------------------------------|---------------------------------------------------------------------------------------------------|
| <b>PO-2Nd</b> | 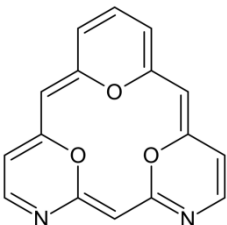 | 1.732 ( <sup>1</sup> B <sub>1</sub> )<br>1.976 ( <sup>3</sup> B <sub>1</sub> )<br>-0.235<br>0.011 | <b>PO-9N</b> |  | 2.731 ( <sup>1</sup> B <sub>1</sub> )<br>3.196 ( <sup>3</sup> B <sub>1</sub> )<br>-0.465<br>0.000 |
|---------------|-----------------------------------------------------------------------------------|---------------------------------------------------------------------------------------------------|--------------|------------------------------------------------------------------------------------|---------------------------------------------------------------------------------------------------|

**Table S2.** Vertical absorption energy of the lowest singlet ( $E(S_1)$ ), and lowest triplet ( $E(T_1)$ ) states (spatial symmetry labels in parenthesis), energy gap between the lowest singlet and lowest triplet states ( $\Delta_{ST} = E(S_1) - E(T_1)$ , in eV), and oscillator strength ( $f$ ), determined with the ADC(2)/cc-pVDZ method at the ground-state equilibrium geometry optimized at the MP2/cc-pVDZ level of theory for **PO** derivatives with amino and nitro substitutions.

| abbreviation               | molecule                                                                            | $E(S_1)$<br>$E(T_1)$<br>$\Delta_{ST}$<br>$f$                                                      | abbreviation               | molecule                                                                              | $E(S_1)$<br>$E(T_1)$<br>$\Delta_{ST}$<br>$f$                                                      |
|----------------------------|-------------------------------------------------------------------------------------|---------------------------------------------------------------------------------------------------|----------------------------|---------------------------------------------------------------------------------------|---------------------------------------------------------------------------------------------------|
| <b>PO-NO<sub>2</sub></b>   | 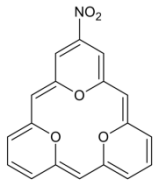  | 1.499 ( <sup>1</sup> B <sub>1</sub> )<br>1.548 ( <sup>3</sup> B <sub>1</sub> )<br>-0.049<br>0.010 | <b>PO-2NO<sub>2</sub>b</b> |   | 1.870 ( <sup>1</sup> B <sub>1</sub> )<br>1.969 ( <sup>3</sup> B <sub>1</sub> )<br>-0.099<br>0.017 |
| <b>PO-NH<sub>2</sub></b>   |  | 1.669 ( <sup>1</sup> A'')                                                                         | <b>PO-2NH<sub>2</sub>a</b> |   | 1.772 ( <sup>1</sup> A'')                                                                         |
|                            |                                                                                     | 1.893 ( <sup>3</sup> A'')                                                                         |                            |                                                                                       | 1.965 ( <sup>3</sup> A'')                                                                         |
|                            |                                                                                     | -0.224                                                                                            |                            |                                                                                       | -0.193                                                                                            |
|                            |                                                                                     | 0.014                                                                                             |                            |                                                                                       | 0.017                                                                                             |
| <b>PO-2NO<sub>2</sub>a</b> |  | 1.434 ( <sup>1</sup> B <sub>1</sub> )<br>1.442 ( <sup>3</sup> A <sub>1</sub> )<br>-0.008<br>0.007 | <b>PO-2NH<sub>2</sub>b</b> |  | 1.763 ( <sup>1</sup> A)<br>1.790 ( <sup>3</sup> A)<br>-0.027<br>0.001                             |

**Table S3.** Vertical absorption energy of the lowest singlet ( $E(S_1)$ ), and lowest triplet ( $E(T_1)$ ) states (spatial symmetry labels in parenthesis), energy gap between the lowest singlet and lowest triplet states ( $\Delta_{ST} = E(S_1) - E(T_1)$ , in eV), and oscillator strength ( $f$ ), determined with the ADC(2)/cc-pVDZ method at the ground-state equilibrium geometry optimized at the MP2/cc-pVDZ level of theory for **PNH** derivatives with nitrogen substitutions to the external rim.

| abbreviation   | molecule                                                                            | $E(S_1)$<br>$E(T_1)$<br>$\Delta_{ST}$<br>$f$              | abbreviation   | molecule                                                                              | $E(S_1)$<br>$E(T_1)$<br>$\Delta_{ST}$<br>$f$              |
|----------------|-------------------------------------------------------------------------------------|-----------------------------------------------------------|----------------|---------------------------------------------------------------------------------------|-----------------------------------------------------------|
| <b>PNH</b>     | 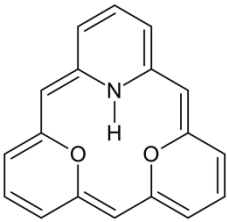   | 1.620 ( $^1B_1$ )<br>1.734 ( $^3B_1$ )<br>-0.114<br>0.037 | <b>PNH-3N</b>  |    | 2.096 ( $^1B_1$ )<br>2.192 ( $^3B_1$ )<br>-0.096<br>0.045 |
| <b>PNH-2Na</b> |   | 1.477 ( $^1B_1$ )<br>1.606 ( $^3B_1$ )<br>-0.129<br>0.042 | <b>PNH-4Na</b> |   | 1.761 ( $^1B_1$ )<br>1.796 ( $^3B_1$ )<br>-0.035<br>0.086 |
| <b>PNH-2Nb</b> |  | 1.869 ( $^1B_1$ )<br>1.890 ( $^3B_1$ )<br>-0.021<br>0.079 | <b>PNH-4Nb</b> |  | 2.218 ( $^1B_1$ )<br>2.387 ( $^3A_1$ )<br>-0.169<br>0.009 |
| <b>PNH-2Nc</b> |  | 1.869 ( $^1B_1$ )<br>2.016 ( $^3B_1$ )<br>-0.147<br>0.034 | <b>PNH-6N</b>  |  | 2.163 ( $^1B_1$ )<br>2.393 ( $^3B_1$ )<br>-0.230<br>0.026 |
| <b>PNH-2Nd</b> |  | 1.939 ( $^1B_1$ )<br>2.138 ( $^3B_1$ )<br>-0.199<br>0.014 | <b>PNH-9N</b>  |  | 2.778 ( $^1B_1$ )<br>3.060 ( $^3B_1$ )<br>-0.282<br>0.032 |

**Table S4.** Vertical absorption energy of the lowest singlet ( $E(S_1)$ ), and lowest triplet ( $E(T_1)$ ) states (spatial symmetry labels in parenthesis), energy gap between the lowest singlet and lowest triplet states ( $\Delta_{ST} = E(S_1) - E(T_1)$ , in eV), and oscillator strength ( $f$ ), determined with the ADC(2)/cc-pVDZ method at the ground-state equilibrium geometry optimized at the MP2/cc-pVDZ level of theory for **PNH** derivatives with amino and nitro substitutions.

| abbreviation                | molecule                                                                            | $E(S_1)$<br>$E(T_1)$<br>$\Delta_{ST}$<br>$f$                                                      | abbreviation                | molecule                                                                              | $E(S_1)$<br>$E(T_1)$<br>$\Delta_{ST}$<br>$f$                                                      |
|-----------------------------|-------------------------------------------------------------------------------------|---------------------------------------------------------------------------------------------------|-----------------------------|---------------------------------------------------------------------------------------|---------------------------------------------------------------------------------------------------|
| <b>PNH-NO<sub>2</sub></b>   | 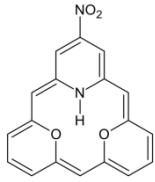   | 1.533 ( <sup>1</sup> B <sub>1</sub> )<br>1.731 ( <sup>3</sup> B <sub>1</sub> )<br>-0.198<br>0.012 | <b>PNH-2NO<sub>2</sub>b</b> |    | 1.792 ( <sup>1</sup> B <sub>1</sub> )<br>1.796 ( <sup>3</sup> B <sub>1</sub> )<br>-0.004<br>0.132 |
| <b>PNH-NH<sub>2</sub></b>   |   | 1.634 ( <sup>1</sup> A'')<br>1.703 ( <sup>3</sup> A'')<br>-0.069<br>0.058                         | <b>PNH-2NH<sub>2</sub>a</b> |    | 1.905 ( <sup>1</sup> B)<br>2.161 ( <sup>3</sup> B)<br>-0.256<br>0.008                             |
| <b>PNH-2NO<sub>2</sub>a</b> |  | 1.432 ( <sup>1</sup> B <sub>1</sub> )<br>1.348 ( <sup>3</sup> B <sub>1</sub> )<br>0.084<br>0.064  | <b>PNH-2NH<sub>2</sub>b</b> |  | 1.635 ( <sup>1</sup> B <sub>2</sub> )<br>1.726 ( <sup>3</sup> B <sub>2</sub> )<br>-0.091<br>0.049 |

**Table S5.** Vertical absorption energy of the lowest singlet ( $E(S_1)$ ), and lowest triplet ( $E(T_1)$ ) states (spatial symmetry labels in parenthesis), energy gap between the lowest singlet and lowest triplet states ( $\Delta_{ST} = E(S_1) - E(T_1)$ , in eV), and oscillator strength (f), determined with the ADC(2)/cc-pVDZ method at the ground-state equilibrium geometry optimized at the MP2/cc-pVDZ level of theory for PS derivatives with nitrogen substitutions to the external rim.

| abbreviation  | molecule | $E(S_1)$<br>$E(T_1)$<br>$\Delta_{ST}$<br>f                | abbreviation  | molecule | $E(S_1)$<br>$E(T_1)$<br>$\Delta_{ST}$<br>f                |
|---------------|----------|-----------------------------------------------------------|---------------|----------|-----------------------------------------------------------|
| <b>PS</b>     |          | 1.446 ( $^1A''$ )<br>1.550 ( $^3A''$ )<br>-0.104<br>0.023 | <b>PS-3N</b>  |          | 1.691 ( $^1A''$ )<br>1.823 ( $^3A''$ )<br>-0.132<br>0.024 |
| <b>PS-2Na</b> |          | 1.612 ( $^1A''$ )<br>1.751 ( $^3A''$ )<br>-0.139<br>0.003 | <b>PS-4Na</b> |          | 1.948 ( $^1A''$ )<br>1.870 ( $^3A''$ )<br>0.078<br>0.013  |
| <b>PS-2Nb</b> |          | 1.749 ( $^1A''$ )<br>1.747 ( $^3A''$ )<br>0.002<br>0.001  | <b>PS-4Nb</b> |          | 1.656 ( $^1A''$ )<br>1.732 ( $^3A''$ )<br>-0.076<br>0.040 |
| <b>PS-2Nc</b> |          | 1.501 ( $^1A''$ )<br>1.624 ( $^3A''$ )<br>-0.123<br>0.022 | <b>PS-6N</b>  |          | 1.759 ( $^1A''$ )<br>1.927 ( $^3A''$ )<br>-0.168<br>0.026 |
| <b>PS-2Nd</b> |          | 1.519 ( $^1A''$ )<br>1.623 ( $^3A''$ )<br>-0.104<br>0.039 | <b>PS-9N</b>  |          | 2.437 ( $^1A''$ )<br>2.660 ( $^3A''$ )<br>-0.223<br>0.017 |

**Table S6.** Vertical absorption energy of the lowest singlet ( $E(S_1)$ ), and lowest triplet ( $E(T_1)$ ) states (spatial symmetry labels in parenthesis), energy gap between the lowest singlet and lowest triplet states ( $\Delta_{ST} = E(S_1) - E(T_1)$ , in eV), and oscillator strength ( $f$ ), determined with the ADC(2)/cc-pVDZ method at the ground-state equilibrium geometry optimized at the MP2/cc-pVDZ level of theory for PS derivatives with amino and nitro substitutions.

| abbreviation               | molecule                                                                            | $E(S_1)$<br>$E(T_1)$<br>$\Delta_{ST}$<br>$f$                           | abbreviation               | molecule                                                                              | $E(S_1)$<br>$E(T_1)$<br>$\Delta_{ST}$<br>$f$                           |
|----------------------------|-------------------------------------------------------------------------------------|------------------------------------------------------------------------|----------------------------|---------------------------------------------------------------------------------------|------------------------------------------------------------------------|
| <b>PS-NO<sub>2</sub></b>   | 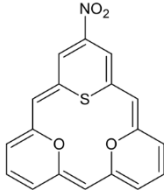   | 1.415 ( <sup>1</sup> A)<br>1.266 ( <sup>3</sup> A)<br>0.149<br>0.055   | <b>PS-2NO<sub>2</sub>b</b> |    | 1.805 ( <sup>1</sup> A)<br>1.938 ( <sup>3</sup> A)<br>- 0.133<br>0.008 |
| <b>PS-NH<sub>2</sub></b>   |   | 1.525 ( <sup>1</sup> A)<br>1.688 ( <sup>3</sup> A)<br>- 0.163<br>0.004 | <b>PS-2NH<sub>2</sub>a</b> |    | 1.517 ( <sup>1</sup> A)<br>1.551 ( <sup>3</sup> A)<br>- 0.034<br>0.058 |
| <b>PS-2NO<sub>2</sub>a</b> |  | 1.577 ( <sup>1</sup> A)<br>1.317 ( <sup>3</sup> A)<br>0.260<br>0.012   | <b>PS-2NH<sub>2</sub>b</b> |  | 1.391 ( <sup>1</sup> A'')                                              |

**Table S7.** Lengths of the external CC/CN bonds in the optimized molecular geometries of the ground ( $S_0$ ), and of the lowest excited singlet ( $S_1$ ) and triplet ( $T_1$ ) states, their adiabatic energy ( $E_{0-0}$ ), energy of the  $S_1 \rightarrow S_0$  or  $T_1 \rightarrow S_0$  vertical emission fluorescence and phosphorescence ( $E_{em}$ ), the adiabatic energy difference between the lowest excited singlet and triplet states ( $\Delta_{ST} = S_1 - T_1$ ), and oscillator strength ( $f_{em}$ ) from the  $S_1$  state of selected PX molecules. Molecular symmetry in a given state is in parentheses, and energies are in electronvolts.

| <b>BCN</b>    |                                                                                     |                                                                                     |                                                                                      |               |
|---------------|-------------------------------------------------------------------------------------|-------------------------------------------------------------------------------------|--------------------------------------------------------------------------------------|---------------|
|               | $S_0(D_{3h})$                                                                       | $S_1(D_{3h})$                                                                       | $T_1(C_{2v})$                                                                        | $\Delta_{ST}$ |
|               | 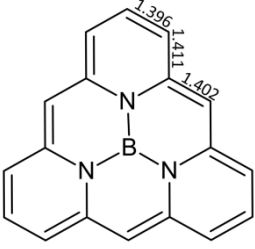   |    |    |               |
| $E_{0-0}$     | -                                                                                   | 1.591                                                                               | 1.613                                                                                | -0.022        |
| $E_{em}$      | -                                                                                   | 1.582                                                                               | 1.270                                                                                | 0.312         |
| $f_{em}$      | -                                                                                   | 0.0                                                                                 | -                                                                                    |               |
| <b>PO</b>     |                                                                                     |                                                                                     |                                                                                      |               |
|               | $S_0(D_{3h})$                                                                       | $S_1(D_{3h})$                                                                       | $T_1(C_{2v})$                                                                        | $\Delta_{ST}$ |
|               |  |  |  |               |
| $E_{0-0}$     | -                                                                                   | 1.552                                                                               | 1.559                                                                                | -0.007        |
| $E_{em}$      | -                                                                                   | 1.540                                                                               | 1.170                                                                                | 0.370         |
| $f_{em}$      | -                                                                                   | 0.0                                                                                 | -                                                                                    |               |
| <b>PNH-4N</b> |                                                                                     |                                                                                     |                                                                                      |               |
|               | $S_0(C_{2v})$                                                                       | $S_1(C_{2v})$                                                                       | $T_1(C_{2v})$                                                                        | $\Delta_{ST}$ |
|               |  |  |  |               |
| $E_{0-0}$     | -                                                                                   | 1.685                                                                               | 1.727                                                                                | -0.042        |
| $E_{em}$      | -                                                                                   | 1.641                                                                               | 1.671                                                                                | -0.030        |
| $f_{em}$      | -                                                                                   | 0.081                                                                               | -                                                                                    |               |

| PNH-6N    |                                                                                   |                                                                                   |                                                                                    |               |
|-----------|-----------------------------------------------------------------------------------|-----------------------------------------------------------------------------------|------------------------------------------------------------------------------------|---------------|
|           | $S_0(C_{2v})$                                                                     | $S_1(C_{2v})$                                                                     | $S_1(C_s)$                                                                         | $\Delta_{ST}$ |
|           | 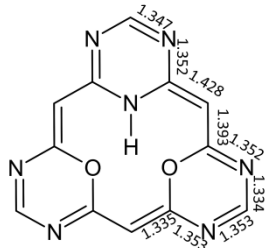 |  |  |               |
| $E_{0-0}$ | -                                                                                 | 2.061                                                                             | 2.164                                                                              | -0.103        |
| $E_{em}$  | -                                                                                 | 1.975                                                                             | 1.435                                                                              | 0.540         |
| $f_{em}$  | -                                                                                 | 0.024                                                                             | -                                                                                  |               |

**Table S7.** Cartesian coordinates of the selected **PX** molecules in its ground electronic state ( $S_0$ ), optimized with the MP2/cc-pVDZ method, and in the lowest excited ( $S_1$ ) and triplet ( $T_1$ ) states optimized with the ADC(2)/cc-pVDZ method.

**BCN,  $S_0$**

|   |            |            |           |
|---|------------|------------|-----------|
| N | 1.2564454  | 0.7256701  | 0.0000000 |
| C | 1.2394698  | 2.1394983  | 0.0000000 |
| C | 2.4719096  | 2.8255166  | 0.0000000 |
| C | 3.6792706  | 2.1249730  | 0.0000000 |
| C | 3.6827041  | 0.7291169  | 0.0000000 |
| C | 2.4725837  | 0.0044097  | 0.0000000 |
| C | -0.0004335 | 2.7936692  | 0.0000000 |
| C | -1.2401091 | 2.1391123  | 0.0000000 |
| C | -2.4727852 | 2.8247554  | 0.0000000 |
| C | -3.6799141 | 2.1238550  | 0.0000000 |
| C | -3.6829219 | 0.7279768  | 0.0000000 |
| C | -2.4725940 | 0.0036616  | 0.0000000 |
| N | -1.2566723 | 0.7252783  | 0.0000000 |
| C | 2.4196068  | -1.3964586 | 0.0000000 |
| C | 1.2331277  | -2.1431630 | 0.0000000 |
| C | 1.2110136  | -3.5534950 | 0.0000000 |
| C | 0.0006423  | -4.2488288 | 0.0000000 |
| C | -1.2099189 | -3.5538749 | 0.0000000 |
| C | -1.2324712 | -2.1435238 | 0.0000000 |
| N | 0.0002270  | -1.4509473 | 0.0000000 |
| C | -2.4191697 | -1.3972122 | 0.0000000 |
| H | 2.4470454  | 3.9175233  | 0.0000000 |
| H | 4.6271556  | 2.6724254  | 0.0000000 |
| H | 4.6161588  | 0.1618770  | 0.0000000 |
| H | 2.1691435  | -4.0779779 | 0.0000000 |
| H | 0.0008096  | -5.3434468 | 0.0000000 |
| H | -2.1678959 | -4.0786387 | 0.0000000 |
| H | -4.6161978 | 0.1604440  | 0.0000000 |
| H | -4.6279656 | 2.6710194  | 0.0000000 |
| H | -2.4482547 | 3.9167706  | 0.0000000 |
| H | -3.3645158 | -1.9431916 | 0.0000000 |
| H | -0.0006150 | 3.8853534  | 0.0000000 |



|   |           |            |           |
|---|-----------|------------|-----------|
| H | 3.3651207 | -1.9421473 | 0.0000000 |
| B | 0.0000007 | -0.0000003 | 0.0000000 |

**BCN, S<sub>1</sub>**

|   |            |           |            |
|---|------------|-----------|------------|
| N | -1.2509954 | 0.0000000 | -0.7222699 |
| C | -2.4763206 | 0.0000000 | -0.0077341 |
| C | -3.6886504 | 0.0000000 | -0.7315861 |
| C | -3.6975103 | 0.0000000 | -2.1347679 |
| C | -2.4778913 | 0.0000000 | -2.8286840 |
| C | -1.2448494 | 0.0000000 | -2.1406994 |
| C | -2.4205313 | 0.0000000 | 1.3974920  |
| C | -1.2314732 | 0.0000000 | 2.1484218  |
| N | 0.0000000  | 0.0000000 | 1.4445301  |
| C | 1.2314732  | 0.0000000 | 2.1484218  |
| C | 1.2107544  | 0.0000000 | 3.5602621  |
| C | 0.0000000  | 0.0000000 | 4.2695092  |
| C | -1.2107544 | 0.0000000 | 3.5602621  |
| B | 0.0000000  | 0.0000000 | 0.0000035  |
| N | 1.2509954  | 0.0000000 | -0.7222699 |
| C | 2.4763206  | 0.0000000 | -0.0077341 |
| C | 3.6886504  | 0.0000000 | -0.7315861 |
| C | 3.6975103  | 0.0000000 | -2.1347679 |
| C | 2.4778913  | 0.0000000 | -2.8286840 |
| C | 1.2448494  | 0.0000000 | -2.1406994 |
| C | 2.4205313  | 0.0000000 | 1.3974920  |
| C | 0.0000000  | 0.0000000 | -2.7949899 |
| H | 2.1718342  | 0.0000000 | 4.0808544  |
| H | 0.0000000  | 0.0000000 | 5.3632157  |
| H | -2.1718342 | 0.0000000 | 4.0808544  |
| H | -4.6200402 | 0.0000000 | -0.1595642 |
| H | -4.6446888 | 0.0000000 | -2.6816228 |
| H | -2.4482021 | 0.0000000 | -3.9213026 |
| H | 2.4482021  | 0.0000000 | -3.9213026 |
| H | 4.6446888  | 0.0000000 | -2.6816228 |
| H | 4.6200402  | 0.0000000 | -0.1595642 |
| H | 0.0000000  | 0.0000000 | -3.8876363 |
| H | 3.3668025  | 0.0000000 | 1.9438060  |
| H | -3.3668025 | 0.0000000 | 1.9438060  |

**BCN, T<sub>1</sub>**

|   |            |           |            |
|---|------------|-----------|------------|
| N | -1.2484450 | 0.0000000 | -0.7257774 |
| C | -2.4656653 | 0.0000000 | 0.0147373  |
| C | -3.7002670 | 0.0000000 | -0.7540757 |
| C | -3.7038403 | 0.0000000 | -2.1200490 |
| C | -2.4542417 | 0.0000000 | -2.8278805 |
| C | -1.2493071 | 0.0000000 | -2.1292020 |
| C | -2.4352187 | 0.0000000 | 1.3847296  |
| C | -1.2347247 | 0.0000000 | 2.1679807  |
| N | 0.0000000  | 0.0000000 | 1.4409470  |
| C | 1.2347247  | 0.0000000 | 2.1679807  |
| C | 1.2096173  | 0.0000000 | 3.5565670  |
| C | 0.0000000  | 0.0000000 | 4.2832704  |
| C | -1.2096173 | 0.0000000 | 3.5565670  |

|   |            |           |            |
|---|------------|-----------|------------|
| B | 0.0000000  | 0.0000000 | 0.0096880  |
| N | 1.2484450  | 0.0000000 | -0.7257774 |
| C | 2.4656653  | 0.0000000 | 0.0147373  |
| C | 3.7002670  | 0.0000000 | -0.7540757 |
| C | 3.7038403  | 0.0000000 | -2.1200490 |
| C | 2.4542417  | 0.0000000 | -2.8278805 |
| C | 1.2493071  | 0.0000000 | -2.1292020 |
| C | 2.4352187  | 0.0000000 | 1.3847296  |
| C | 0.0000000  | 0.0000000 | -2.7901435 |
| H | 2.1742515  | 0.0000000 | 4.0752940  |
| H | 0.0000000  | 0.0000000 | 5.3767269  |
| H | -2.1742515 | 0.0000000 | 4.0752940  |
| H | -4.6350543 | 0.0000000 | -0.1858127 |
| H | -4.6457935 | 0.0000000 | -2.6762418 |
| H | -2.4223180 | 0.0000000 | -3.9198372 |
| H | 2.4223180  | 0.0000000 | -3.9198372 |
| H | 4.6457935  | 0.0000000 | -2.6762418 |
| H | 4.6350543  | 0.0000000 | -0.1858127 |
| H | 0.0000000  | 0.0000000 | -3.8829863 |
| H | 3.3883771  | 0.0000000 | 1.9207377  |
| H | -3.3883771 | 0.0000000 | 1.9207377  |

**PO, S<sub>0</sub>**

|   |            |            |           |
|---|------------|------------|-----------|
| O | 1.2983169  | 0.7495852  | 0.0000000 |
| C | 1.2679782  | 2.1230487  | 0.0000000 |
| C | 2.4837136  | 2.8327726  | 0.0000000 |
| C | 3.6960166  | 2.1338978  | 0.0000000 |
| C | 3.6951085  | 0.7345752  | 0.0000000 |
| C | 2.4726018  | 0.0365793  | 0.0000000 |
| C | 0.0000000  | 2.7315997  | 0.0000000 |
| C | -1.2679782 | 2.1230487  | 0.0000000 |
| O | -1.2983169 | 0.7495852  | 0.0000000 |
| C | -2.4726018 | 0.0365793  | 0.0000000 |
| C | -3.6951085 | 0.7345752  | 0.0000000 |
| C | -3.6960166 | 2.1338978  | 0.0000000 |
| C | -2.4837136 | 2.8327726  | 0.0000000 |
| C | -2.3656333 | -1.3657974 | 0.0000000 |
| C | -1.2046237 | -2.1596233 | 0.0000000 |
| O | 0.0000000  | -1.4991657 | 0.0000000 |
| C | 1.2046237  | -2.1596233 | 0.0000000 |
| C | 1.2113949  | -3.5673430 | 0.0000000 |
| C | 0.0000000  | -4.2677907 | 0.0000000 |
| C | -1.2113949 | -3.5673430 | 0.0000000 |
| C | 2.3656333  | -1.3657974 | 0.0000000 |
| H | 3.3126706  | -1.9125697 | 0.0000000 |
| H | 4.6446020  | 2.6815638  | 0.0000000 |
| H | 0.0000000  | 3.8251441  | 0.0000000 |
| H | -3.3126706 | -1.9125697 | 0.0000000 |
| H | -4.6446020 | 2.6815638  | 0.0000000 |
| H | 0.0000000  | -5.3631758 | 0.0000000 |
| H | 2.1742400  | -4.0844621 | 0.0000000 |
| H | -2.4501293 | 3.9251806  | 0.0000000 |
| H | -2.1742400 | -4.0844621 | 0.0000000 |

|   |            |           |           |
|---|------------|-----------|-----------|
| H | -4.6243693 | 0.1592864 | 0.0000000 |
| H | 2.4501293  | 3.9251806 | 0.0000000 |
| H | 4.6243693  | 0.1592864 | 0.0000000 |

**PO, S<sub>1</sub>**

|   |            |            |           |
|---|------------|------------|-----------|
| O | 1.2858584  | 0.7423906  | 0.0000000 |
| C | 1.2721647  | 2.1210177  | 0.0000000 |
| C | 2.4879982  | 2.8340844  | 0.0000000 |
| C | 3.7134041  | 2.1439297  | 0.0000000 |
| C | 3.6983863  | 0.7376196  | 0.0000000 |
| C | 2.4729345  | 0.0412164  | 0.0000000 |
| C | 0.0000000  | 2.7319629  | 0.0000000 |
| C | -1.2721647 | 2.1210177  | 0.0000000 |
| O | -1.2858584 | 0.7423906  | 0.0000000 |
| C | -2.4729345 | 0.0412164  | 0.0000000 |
| C | -3.6983863 | 0.7376196  | 0.0000000 |
| C | -3.7134041 | 2.1439297  | 0.0000000 |
| C | -2.4879982 | 2.8340844  | 0.0000000 |
| C | -2.3659468 | -1.3659824 | 0.0000000 |
| C | -1.2007728 | -2.1622360 | 0.0000000 |
| O | 0.0000000  | -1.4847802 | 0.0000000 |
| C | 1.2007728  | -2.1622360 | 0.0000000 |
| C | 1.2103915  | -3.5717019 | 0.0000000 |
| C | 0.0000000  | -4.2878561 | 0.0000000 |
| C | -1.2103915 | -3.5717019 | 0.0000000 |
| C | 2.3659468  | -1.3659824 | 0.0000000 |
| H | 3.3136263  | -1.9131241 | 0.0000000 |
| H | 4.6611744  | 2.6911227  | 0.0000000 |
| H | 0.0000000  | 3.8262498  | 0.0000000 |
| H | -3.3136263 | -1.9131241 | 0.0000000 |
| H | -4.6611744 | 2.6911227  | 0.0000000 |
| H | 0.0000000  | -5.3822492 | 0.0000000 |
| H | 2.1774244  | -4.0822741 | 0.0000000 |
| H | -2.4466512 | 3.9268485  | 0.0000000 |
| H | -2.1774244 | -4.0822741 | 0.0000000 |
| H | -4.6240705 | 0.1554251  | 0.0000000 |
| H | 2.4466512  | 3.9268485  | 0.0000000 |
| H | 4.6240705  | 0.1554251  | 0.0000000 |

**PO, T<sub>1</sub>**

|   |            |            |           |
|---|------------|------------|-----------|
| O | -0.0267253 | 1.4755496  | 0.0000000 |
| C | 1.1956503  | 2.1406980  | 0.0000000 |
| C | 1.1706015  | 3.5935751  | 0.0000000 |
| C | -0.0089846 | 4.2841744  | 0.0000000 |
| C | -1.2453631 | 3.5422274  | 0.0000000 |
| C | -1.2105242 | 2.1554512  | 0.0000000 |
| C | 2.3479099  | 1.3969055  | 0.0000000 |
| H | 3.2833035  | 1.9665883  | 0.0000000 |
| H | 2.1349430  | 4.1117210  | 0.0000000 |
| H | -0.0238124 | 5.3785017  | 0.0000000 |
| H | -2.2147009 | 4.0474938  | 0.0000000 |
| O | -1.2806001 | -0.7332281 | 0.0000000 |
| O | 1.2881673  | -0.7321420 | 0.0000000 |

|   |            |            |           |
|---|------------|------------|-----------|
| C | -2.4705596 | -0.0640604 | 0.0000000 |
| C | 1.3075750  | -2.1217317 | 0.0000000 |
| C | -3.6799308 | -0.7454002 | 0.0000000 |
| C | 2.5063393  | -2.8144051 | 0.0000000 |
| C | -3.6836246 | -2.1864547 | 0.0000000 |
| C | 3.7443888  | -2.1257077 | 0.0000000 |
| C | -2.4862718 | -2.8461831 | 0.0000000 |
| C | 3.7012869  | -0.7115100 | 0.0000000 |
| C | -1.2255572 | -2.1232207 | 0.0000000 |
| C | 2.4914303  | -0.0354765 | 0.0000000 |
| C | -2.3811939 | 1.3519241  | 0.0000000 |
| C | 0.0025752  | -2.7323502 | 0.0000000 |
| H | -3.3331320 | 1.8921158  | 0.0000000 |
| H | -0.0079083 | -3.8274796 | 0.0000000 |
| H | -4.6104484 | -0.1717754 | 0.0000000 |
| H | 2.4666044  | -3.9093124 | 0.0000000 |
| H | -4.6310332 | -2.7343849 | 0.0000000 |
| H | 4.6956335  | -2.6659444 | 0.0000000 |
| H | -2.4372821 | -3.9397802 | 0.0000000 |
| H | 4.6212437  | -0.1163784 | 0.0000000 |

#### PNH, S<sub>0</sub>

|   |            |           |            |
|---|------------|-----------|------------|
| C | -2.5343937 | 0.0000000 | -0.0361462 |
| O | -1.3413611 | 0.0000000 | -0.7469227 |
| C | -1.2798636 | 0.0000000 | -2.1321530 |
| C | -2.4870455 | 0.0000000 | -2.8480250 |
| C | -3.7114059 | 0.0000000 | -2.1605008 |
| C | -3.7440353 | 0.0000000 | -0.7661750 |
| C | 0.0000000  | 0.0000000 | -2.7177337 |
| C | 1.2798636  | 0.0000000 | -2.1321530 |
| O | 1.3413611  | 0.0000000 | -0.7469227 |
| C | 2.5343937  | 0.0000000 | -0.0361462 |
| C | 3.7440353  | 0.0000000 | -0.7661750 |
| C | 3.7114059  | 0.0000000 | -2.1605008 |
| C | 2.4870455  | 0.0000000 | -2.8480250 |
| C | 2.4244237  | 0.0000000 | 1.3587371  |
| C | 1.2300152  | 0.0000000 | 2.1348845  |
| N | 0.0000000  | 0.0000000 | 1.5185155  |
| C | -1.2300152 | 0.0000000 | 2.1348845  |
| C | -1.2198563 | 0.0000000 | 3.5483812  |
| C | 0.0000000  | 0.0000000 | 4.2380875  |
| C | 1.2198563  | 0.0000000 | 3.5483812  |
| C | -2.4244237 | 0.0000000 | 1.3587371  |
| H | -3.3673712 | 0.0000000 | 1.9116146  |
| H | -2.1726582 | 0.0000000 | 4.0845779  |
| H | 0.0000000  | 0.0000000 | 5.3336886  |
| H | 2.1726582  | 0.0000000 | 4.0845779  |
| H | 3.3673712  | 0.0000000 | 1.9116146  |
| H | 0.0000000  | 0.0000000 | -3.8117977 |
| H | 4.6852585  | 0.0000000 | -0.2109735 |
| H | -2.4429628 | 0.0000000 | -3.9397355 |
| H | 4.6500451  | 0.0000000 | -2.7255031 |
| H | -4.6500451 | 0.0000000 | -2.7255031 |

|   |            |           |            |
|---|------------|-----------|------------|
| H | 2.4429628  | 0.0000000 | -3.9397355 |
| H | -4.6852585 | 0.0000000 | -0.2109735 |
| H | 0.0000000  | 0.0000000 | 0.4952557  |

**PNH, S<sub>1</sub>**

|   |            |           |            |
|---|------------|-----------|------------|
| C | -2.5271431 | 0.0000000 | -0.0448491 |
| O | -1.3154811 | 0.0000000 | -0.7400018 |
| C | -1.2780018 | 0.0000000 | -2.1325096 |
| C | -2.4874936 | 0.0000000 | -2.8517940 |
| C | -3.7241942 | 0.0000000 | -2.1808077 |
| C | -3.7308045 | 0.0000000 | -0.7710333 |
| C | 0.0000000  | 0.0000000 | -2.7309986 |
| C | 1.2780018  | 0.0000000 | -2.1325096 |
| O | 1.3154811  | 0.0000000 | -0.7400018 |
| C | 2.5271431  | 0.0000000 | -0.0448491 |
| C | 3.7308045  | 0.0000000 | -0.7710333 |
| C | 3.7241942  | 0.0000000 | -2.1808077 |
| C | 2.4874936  | 0.0000000 | -2.8517940 |
| C | 2.4173020  | 0.0000000 | 1.3575226  |
| C | 1.2294678  | 0.0000000 | 2.1444304  |
| N | 0.0000000  | 0.0000000 | 1.5249090  |
| C | -1.2294678 | 0.0000000 | 2.1444304  |
| C | -1.2233067 | 0.0000000 | 3.5668117  |
| C | 0.0000000  | 0.0000000 | 4.2542532  |
| C | 1.2233067  | 0.0000000 | 3.5668117  |
| C | -2.4173020 | 0.0000000 | 1.3575226  |
| H | -3.3634318 | 0.0000000 | 1.9069126  |
| H | -2.1766692 | 0.0000000 | 4.1019705  |
| H | 0.0000000  | 0.0000000 | 5.3501851  |
| H | 2.1766692  | 0.0000000 | 4.1019705  |
| H | 3.3634318  | 0.0000000 | 1.9069126  |
| H | 0.0000000  | 0.0000000 | -3.8257795 |
| H | 4.6675713  | 0.0000000 | -0.2063373 |
| H | -2.4314495 | 0.0000000 | -3.9442657 |
| H | 4.6630567  | 0.0000000 | -2.7424839 |
| H | -4.6630567 | 0.0000000 | -2.7424839 |
| H | 2.4314495  | 0.0000000 | -3.9442657 |
| H | -4.6675713 | 0.0000000 | -0.2063373 |
| H | 0.0000000  | 0.0000000 | 0.5003004  |

**PNH, T<sub>1</sub>**

|   |            |           |            |
|---|------------|-----------|------------|
| C | -2.5567888 | 0.0000000 | -0.0576348 |
| O | -1.3392769 | 0.0000000 | -0.7237751 |
| C | -1.2742206 | 0.0000000 | -2.1289631 |
| C | -2.5087409 | 0.0000000 | -2.8485437 |
| C | -3.7212569 | 0.0000000 | -2.2000608 |
| C | -3.7357652 | 0.0000000 | -0.7511350 |
| C | 0.0000000  | 0.0000000 | -2.7116613 |
| C | 1.2742206  | 0.0000000 | -2.1289631 |
| O | 1.3392769  | 0.0000000 | -0.7237751 |
| C | 2.5567888  | 0.0000000 | -0.0576348 |
| C | 3.7357652  | 0.0000000 | -0.7511350 |
| C | 3.7212569  | 0.0000000 | -2.2000608 |

|   |            |           |            |
|---|------------|-----------|------------|
| C | 2.5087409  | 0.0000000 | -2.8485437 |
| C | 2.4192828  | 0.0000000 | 1.3850698  |
| C | 1.2337267  | 0.0000000 | 2.1124899  |
| N | 0.0000000  | 0.0000000 | 1.4965070  |
| C | -1.2337267 | 0.0000000 | 2.1124899  |
| C | -1.2158164 | 0.0000000 | 3.5501259  |
| C | 0.0000000  | 0.0000000 | 4.2436631  |
| C | 1.2158164  | 0.0000000 | 3.5501259  |
| C | -2.4192828 | 0.0000000 | 1.3850698  |
| H | -3.3544988 | 0.0000000 | 1.9529906  |
| H | -2.1699175 | 0.0000000 | 4.0851811  |
| H | 0.0000000  | 0.0000000 | 5.3390449  |
| H | 2.1699175  | 0.0000000 | 4.0851811  |
| H | 3.3544988  | 0.0000000 | 1.9529906  |
| H | 0.0000000  | 0.0000000 | -3.8076638 |
| H | 4.6750219  | 0.0000000 | -0.1907620 |
| H | -2.4489523 | 0.0000000 | -3.9422239 |
| H | 4.6617932  | 0.0000000 | -2.7594527 |
| H | -4.6617932 | 0.0000000 | -2.7594527 |
| H | 2.4489523  | 0.0000000 | -3.9422239 |
| H | -4.6750219 | 0.0000000 | -0.1907620 |
| H | 0.0000000  | 0.0000000 | 0.4734980  |

**PS, S<sub>0</sub>**

|   |            |            |            |
|---|------------|------------|------------|
| C | -0.0593146 | -3.5218802 | -1.2393100 |
| C | 0.3753474  | -2.1895380 | -1.3751159 |
| S | 1.2403185  | -1.4969073 | 0.0000000  |
| C | 0.3753474  | -2.1895380 | 1.3751159  |
| C | -0.0593146 | -3.5218802 | 1.2393100  |
| C | -0.1722747 | -4.1825402 | 0.0000000  |
| C | 0.2232096  | -1.3919393 | -2.5316111 |
| C | 0.1161555  | 0.0118842  | -2.5716513 |
| O | -0.0015119 | 0.6717987  | -1.3578518 |
| C | -0.0731424 | 2.0435172  | -1.2772290 |
| C | -0.1194658 | 2.7959946  | -2.4650531 |
| C | -0.0768885 | 2.1557110  | -3.7092469 |
| C | 0.0485327  | 0.7611428  | -3.7568642 |
| C | -0.1125661 | 2.6306541  | 0.0000000  |
| C | -0.0731424 | 2.0435172  | 1.2772290  |
| O | -0.0015119 | 0.6717987  | 1.3578518  |
| C | 0.1161555  | 0.0118842  | 2.5716513  |
| C | 0.0485327  | 0.7611428  | 3.7568642  |
| C | -0.0768885 | 2.1557110  | 3.7092469  |
| C | -0.1194658 | 2.7959946  | 2.4650531  |
| C | 0.2232096  | -1.3919393 | 2.5316111  |
| H | 0.1081615  | -1.8986918 | 3.4984085  |
| H | -0.1157861 | 2.7399076  | 4.6342425  |
| H | -0.1979153 | 3.7216644  | 0.0000000  |
| H | 0.1081615  | -1.8986918 | -3.4984085 |
| H | -0.1157861 | 2.7399076  | -4.6342425 |
| H | -0.5635667 | -5.2065501 | 0.0000000  |
| H | -0.4536866 | -4.0230616 | 2.1342525  |
| H | -0.1829119 | 3.8849780  | -2.3865003 |

|   |            |            |            |
|---|------------|------------|------------|
| H | -0.4536866 | -4.0230616 | -2.1342525 |
| H | 0.1143033  | 0.2270164  | -4.7092356 |
| H | -0.1829119 | 3.8849780  | 2.3865003  |
| H | 0.1143033  | 0.2270164  | 4.7092356  |

**PS, S<sub>1</sub>**

|   |            |            |            |
|---|------------|------------|------------|
| O | -0.2571384 | 0.6364857  | -1.3384726 |
| C | 0.0530444  | 0.0498243  | -2.5527304 |
| C | -0.3559011 | 0.6662229  | -3.7501386 |
| C | -1.0331668 | 1.8936189  | -3.7166675 |
| C | -1.2944080 | 2.4883460  | -2.4721240 |
| C | -0.9058515 | 1.8464473  | -1.2775950 |
| C | 0.7404570  | -1.1815535 | -2.4902570 |
| C | 1.3257194  | -1.7834348 | -1.3490649 |
| C | 1.5250103  | -3.1764467 | -1.2299301 |
| C | 1.7558134  | -3.8327660 | 0.0000000  |
| C | 1.5250103  | -3.1764467 | 1.2299301  |
| C | 1.3257194  | -1.7834348 | 1.3490649  |
| S | 1.8787057  | -0.7724022 | 0.0000000  |
| C | -1.1751796 | 2.3721118  | 0.0000000  |
| C | -0.9058515 | 1.8464473  | 1.2775950  |
| C | -1.2944080 | 2.4883460  | 2.4721240  |
| C | -1.0331668 | 1.8936189  | 3.7166675  |
| C | -0.3559011 | 0.6662229  | 3.7501386  |
| C | 0.0530444  | 0.0498243  | 2.5527304  |
| O | -0.2571384 | 0.6364857  | 1.3384726  |
| C | 0.7404570  | -1.1815535 | 2.4902570  |
| H | -0.1144534 | 0.1700843  | -4.6936087 |
| H | -1.3429095 | 2.3844774  | -4.6434164 |
| H | -1.8099093 | 3.4488028  | -2.3962202 |
| H | -1.8099093 | 3.4488028  | 2.3962202  |
| H | -1.3429095 | 2.3844774  | 4.6434164  |
| H | -0.1144534 | 0.1700843  | 4.6936087  |
| H | 1.3652810  | -3.7902438 | 2.1270907  |
| H | 1.8896082  | -4.9190074 | 0.0000000  |
| H | 1.3652810  | -3.7902438 | -2.1270907 |
| H | 0.7802678  | -1.7420759 | 3.4331560  |
| H | 0.7802678  | -1.7420759 | -3.4331560 |
| H | -1.7010317 | 3.3309543  | 0.0000000  |

**PS, T<sub>1</sub>**

|   |            |            |            |
|---|------------|------------|------------|
| O | -0.4291527 | 0.4986292  | -1.3456624 |
| C | 0.0472887  | 0.0013056  | -2.5624993 |
| C | -0.3567540 | 0.6866660  | -3.7741043 |
| C | -1.0209139 | 1.8807969  | -3.7294915 |
| C | -1.2923609 | 2.4534418  | -2.4388327 |
| C | -0.9697445 | 1.7548744  | -1.2845201 |
| C | 0.8366539  | -1.1147123 | -2.5452128 |
| C | 1.3599820  | -1.7775719 | -1.3636309 |
| C | 1.4641025  | -3.1580827 | -1.2296812 |
| C | 1.6787161  | -3.8309105 | 0.0000000  |
| C | 1.4641025  | -3.1580827 | 1.2296812  |
| C | 1.3599820  | -1.7775719 | 1.3636309  |

|   |            |            |            |
|---|------------|------------|------------|
| S | 1.8736952  | -0.7653375 | 0.0000000  |
| C | -1.2231226 | 2.2938083  | 0.0000000  |
| C | -0.9697445 | 1.7548744  | 1.2845201  |
| C | -1.2923609 | 2.4534418  | 2.4388327  |
| C | -1.0209139 | 1.8807969  | 3.7294915  |
| C | -0.3567540 | 0.6866660  | 3.7741043  |
| C | 0.0472887  | 0.0013056  | 2.5624993  |
| O | -0.4291527 | 0.4986292  | 1.3456624  |
| C | 0.8366539  | -1.1147123 | 2.5452128  |
| H | -0.0800837 | 0.2225672  | -4.7256056 |
| H | -1.3110412 | 2.4074514  | -4.6422695 |
| H | -1.7488413 | 3.4414327  | -2.3419733 |
| H | -1.7488413 | 3.4414327  | 2.3419733  |
| H | -1.3110412 | 2.4074514  | 4.6422695  |
| H | -0.0800837 | 0.2225672  | 4.7256056  |
| H | 1.2582236  | -3.7657312 | 2.1230880  |
| H | 1.7405228  | -4.9236965 | 0.0000000  |
| H | 1.2582236  | -3.7657312 | -2.1230880 |
| H | 1.0570385  | -1.5576113 | 3.5249494  |
| H | 1.0570385  | -1.5576113 | -3.5249494 |
| H | -1.6986058 | 3.2792244  | 0.0000000  |

#### PNH-4N, S<sub>0</sub>

|   |            |           |            |
|---|------------|-----------|------------|
| C | -2.4713931 | 0.0000000 | 0.4320629  |
| O | -1.3160564 | 0.0000000 | -0.3464311 |
| C | -1.2753746 | 0.0000000 | -1.7223130 |
| C | -2.5101698 | 0.0000000 | -2.3988328 |
| C | -3.6989843 | 0.0000000 | -1.6616343 |
| C | -3.6949197 | 0.0000000 | -0.2602965 |
| C | 0.0000000  | 0.0000000 | -2.3241599 |
| C | 1.2753746  | 0.0000000 | -1.7223130 |
| O | 1.3160564  | 0.0000000 | -0.3464311 |
| C | 2.4713931  | 0.0000000 | 0.4320629  |
| C | 3.6949197  | 0.0000000 | -0.2602965 |
| C | 3.6989843  | 0.0000000 | -1.6616343 |
| C | 2.5101698  | 0.0000000 | -2.3988328 |
| N | 2.3831169  | 0.0000000 | 1.7619776  |
| C | 1.2157778  | 0.0000000 | 2.4374337  |
| N | 0.0000000  | 0.0000000 | 1.8012753  |
| C | -1.2157778 | 0.0000000 | 2.4374337  |
| N | -1.2224888 | 0.0000000 | 3.7866397  |
| C | 0.0000000  | 0.0000000 | 4.3509960  |
| N | 1.2224888  | 0.0000000 | 3.7866397  |
| N | -2.3831169 | 0.0000000 | 1.7619776  |
| H | 0.0000000  | 0.0000000 | 5.4481071  |
| H | 0.0000000  | 0.0000000 | -3.4177322 |
| H | 4.6091976  | 0.0000000 | 0.3347874  |
| H | -2.5120681 | 0.0000000 | -3.4912045 |
| H | 4.6572949  | 0.0000000 | -2.1925278 |
| H | -4.6572949 | 0.0000000 | -2.1925278 |
| H | 2.5120681  | 0.0000000 | -3.4912045 |
| H | -4.6091976 | 0.0000000 | 0.3347874  |
| H | 0.0000000  | 0.0000000 | 0.7821793  |



**PNH-4N, S<sub>1</sub>**

|   |            |           |            |
|---|------------|-----------|------------|
| C | -2.4595596 | 0.0000000 | 0.4297101  |
| O | -1.2851706 | 0.0000000 | -0.3366545 |
| C | -1.2777993 | 0.0000000 | -1.7265861 |
| C | -2.5087267 | 0.0000000 | -2.3996947 |
| C | -3.7190241 | 0.0000000 | -1.6738893 |
| C | -3.6859232 | 0.0000000 | -0.2666505 |
| C | 0.0000000  | 0.0000000 | -2.3398444 |
| C | 1.2777993  | 0.0000000 | -1.7265861 |
| O | 1.2851706  | 0.0000000 | -0.3366545 |
| C | 2.4595596  | 0.0000000 | 0.4297101  |
| C | 3.6859232  | 0.0000000 | -0.2666505 |
| C | 3.7190241  | 0.0000000 | -1.6738893 |
| C | 2.5087267  | 0.0000000 | -2.3996947 |
| N | 2.3788068  | 0.0000000 | 1.7565772  |
| C | 1.2112415  | 0.0000000 | 2.4455512  |
| N | 0.0000000  | 0.0000000 | 1.8082671  |
| C | -1.2112415 | 0.0000000 | 2.4455512  |
| N | -1.2251606 | 0.0000000 | 3.8037872  |
| C | 0.0000000  | 0.0000000 | 4.3647456  |
| N | 1.2251606  | 0.0000000 | 3.8037872  |
| N | -2.3788068 | 0.0000000 | 1.7565772  |
| H | 0.0000000  | 0.0000000 | 5.4623540  |
| H | 0.0000000  | 0.0000000 | -3.4346232 |
| H | 4.5935498  | 0.0000000 | 0.3410541  |
| H | -2.5017390 | 0.0000000 | -3.4934970 |
| H | 4.6769523  | 0.0000000 | -2.2023683 |
| H | -4.6769523 | 0.0000000 | -2.2023683 |
| H | 2.5017390  | 0.0000000 | -3.4934970 |
| H | -4.5935498 | 0.0000000 | 0.3410541  |
| H | 0.0000000  | 0.0000000 | 0.7844218  |

**PNH-4N, T<sub>1</sub>**

|   |            |           |            |
|---|------------|-----------|------------|
| C | -2.4562529 | 0.0000000 | 0.4295081  |
| O | -1.2888272 | 0.0000000 | -0.3266541 |
| C | -1.2758759 | 0.0000000 | -1.7260778 |
| C | -2.5117043 | 0.0000000 | -2.3984319 |
| C | -3.7148400 | 0.0000000 | -1.6805883 |
| C | -3.6805790 | 0.0000000 | -0.2660504 |
| C | 0.0000000  | 0.0000000 | -2.3294508 |
| C | 1.2758759  | 0.0000000 | -1.7260778 |
| O | 1.2888272  | 0.0000000 | -0.3266541 |
| C | 2.4562529  | 0.0000000 | 0.4295081  |
| C | 3.6805790  | 0.0000000 | -0.2660504 |
| C | 3.7148400  | 0.0000000 | -1.6805883 |
| C | 2.5117043  | 0.0000000 | -2.3984319 |
| N | 2.3815517  | 0.0000000 | 1.7588914  |
| C | 1.2123477  | 0.0000000 | 2.4433169  |
| N | 0.0000000  | 0.0000000 | 1.8081683  |
| C | -1.2123477 | 0.0000000 | 2.4433169  |
| N | -1.2237662 | 0.0000000 | 3.7972713  |
| C | 0.0000000  | 0.0000000 | 4.3592300  |

|   |            |           |            |
|---|------------|-----------|------------|
| N | 1.2237662  | 0.0000000 | 3.7972713  |
| N | -2.3815517 | 0.0000000 | 1.7588914  |
| H | 0.0000000  | 0.0000000 | 5.4566641  |
| H | 0.0000000  | 0.0000000 | -3.4250582 |
| H | 4.5873877  | 0.0000000 | 0.3424433  |
| H | -2.5026594 | 0.0000000 | -3.4928107 |
| H | 4.6732233  | 0.0000000 | -2.2076880 |
| H | -4.6732233 | 0.0000000 | -2.2076880 |
| H | 2.5026594  | 0.0000000 | -3.4928107 |
| H | -4.5873877 | 0.0000000 | 0.3424433  |
| H | 0.0000000  | 0.0000000 | 0.7841868  |

**PNH-6N, S<sub>0</sub>**

|   |            |           |            |
|---|------------|-----------|------------|
| N | 0.0000000  | 0.0000000 | -1.4710900 |
| C | -1.2041591 | 0.0000000 | -2.1117360 |
| N | -1.2188032 | 0.0000000 | -3.4634308 |
| C | 0.0000000  | 0.0000000 | -4.0359510 |
| N | 1.2188032  | 0.0000000 | -3.4634308 |
| C | 1.2041591  | 0.0000000 | -2.1117360 |
| C | -2.4096689 | 0.0000000 | -1.3467818 |
| C | -2.4928921 | 0.0000000 | 0.0435470  |
| N | -3.6591963 | 0.0000000 | 0.7265953  |
| C | -3.5325503 | 0.0000000 | 2.0544755  |
| N | -2.4076555 | 0.0000000 | 2.8056787  |
| C | -1.2673452 | 0.0000000 | 2.1122657  |
| O | -1.2862762 | 0.0000000 | 0.7307509  |
| C | 0.0000000  | 0.0000000 | 2.7222968  |
| C | 1.2673452  | 0.0000000 | 2.1122657  |
| O | 1.2862762  | 0.0000000 | 0.7307509  |
| C | 2.4928921  | 0.0000000 | 0.0435470  |
| N | 3.6591963  | 0.0000000 | 0.7265953  |
| C | 3.5325503  | 0.0000000 | 2.0544755  |
| N | 2.4076555  | 0.0000000 | 2.8056787  |
| H | 4.4715839  | 0.0000000 | 2.6211388  |
| C | 2.4096689  | 0.0000000 | -1.3467818 |
| H | -4.4715839 | 0.0000000 | 2.6211388  |
| H | -3.3510942 | 0.0000000 | -1.8960163 |
| H | 0.0000000  | 0.0000000 | 3.8125824  |
| H | 3.3510942  | 0.0000000 | -1.8960163 |
| H | 0.0000000  | 0.0000000 | -5.1325932 |
| H | 0.0000000  | 0.0000000 | -0.4482160 |

**PNH-6N, S<sub>1</sub>**

|   |            |           |            |
|---|------------|-----------|------------|
| N | 0.0000000  | 0.0000000 | -1.4750442 |
| C | -1.2040283 | 0.0000000 | -2.1210942 |
| N | -1.2214559 | 0.0000000 | -3.4802947 |
| C | 0.0000000  | 0.0000000 | -4.0511188 |
| N | 1.2214559  | 0.0000000 | -3.4802947 |
| C | 1.2040283  | 0.0000000 | -2.1210942 |
| C | -2.4062468 | 0.0000000 | -1.3545301 |
| C | -2.4963688 | 0.0000000 | 0.0528791  |
| N | -3.6468656 | 0.0000000 | 0.7203546  |
| C | -3.5475615 | 0.0000000 | 2.0779526  |

|   |            |           |            |
|---|------------|-----------|------------|
| N | -2.4117125 | 0.0000000 | 2.8099767  |
| C | -1.2680374 | 0.0000000 | 2.1170327  |
| O | -1.2696555 | 0.0000000 | 0.7235523  |
| C | 0.0000000  | 0.0000000 | 2.7407415  |
| C | 1.2680374  | 0.0000000 | 2.1170327  |
| O | 1.2696555  | 0.0000000 | 0.7235523  |
| C | 2.4963688  | 0.0000000 | 0.0528791  |
| N | 3.6468656  | 0.0000000 | 0.7203546  |
| C | 3.5475615  | 0.0000000 | 2.0779526  |
| N | 2.4117125  | 0.0000000 | 2.8099767  |
| H | 4.4897750  | 0.0000000 | 2.6345188  |
| C | 2.4062468  | 0.0000000 | -1.3545301 |
| H | -4.4897750 | 0.0000000 | 2.6345188  |
| H | -3.3483609 | 0.0000000 | -1.9047698 |
| H | 0.0000000  | 0.0000000 | 3.8322508  |
| H | 3.3483609  | 0.0000000 | -1.9047698 |
| H | 0.0000000  | 0.0000000 | -5.1480439 |
| H | 0.0000000  | 0.0000000 | -0.4499414 |

**PNH-6N, T<sub>1</sub>**

|   |            |            |           |
|---|------------|------------|-----------|
| N | 2.4298179  | -2.8070588 | 0.0000000 |
| C | 1.2584096  | -2.1190735 | 0.0000000 |
| O | 1.2839343  | -0.7088210 | 0.0000000 |
| C | 2.5064708  | -0.0584102 | 0.0000000 |
| N | 3.6454406  | -0.7061245 | 0.0000000 |
| C | 3.5289797  | -2.0815202 | 0.0000000 |
| C | 0.0066045  | -2.7310942 | 0.0000000 |
| C | -1.2618781 | -2.1362027 | 0.0000000 |
| N | -2.4388129 | -2.8033053 | 0.0000000 |
| C | -3.5503221 | -2.1105694 | 0.0000000 |
| N | -3.6482644 | -0.6887335 | 0.0000000 |
| C | -2.5018407 | -0.0846827 | 0.0000000 |
| O | -1.2859230 | -0.7064255 | 0.0000000 |
| C | -2.4035379 | 1.3587320  | 0.0000000 |
| C | -1.1796516 | 2.1242269  | 0.0000000 |
| N | 0.0022683  | 1.4665871  | 0.0000000 |
| C | 1.2260880  | 2.0956512  | 0.0000000 |
| N | 1.2033828  | 3.4832510  | 0.0000000 |
| C | 0.0130174  | 4.0466127  | 0.0000000 |
| N | -1.2333766 | 3.4565828  | 0.0000000 |
| C | 2.4075257  | 1.3720613  | 0.0000000 |
| H | 4.4798654  | -2.6253811 | 0.0000000 |
| H | -4.5060556 | -2.6399252 | 0.0000000 |
| H | -3.3410276 | 1.9183324  | 0.0000000 |
| H | 0.0175416  | -3.8226971 | 0.0000000 |
| H | 3.3449620  | 1.9264301  | 0.0000000 |
| H | -0.0046376 | 5.1422183  | 0.0000000 |
| H | 0.0010194  | 0.4393389  | 0.0000000 |
